# Supplementary material for: Luminescence Mechanism of Carbon Dots by Tailoring Functional Groups for Sensing Fe3+ Ions
Source: MDPI journal article supplement (doi:10.3390/nano8040233), 2018-04-12
Supplement: s1 [file s1]

- 1
- 2
- 3
- 4
- 5
- 6
- 7
- 8
- 9

3  
4  
5  
6  
7  
8  
9

5  
6  
7  
8  
9

6  
7  
8  
9

89

\*Corresponding authors. Tel.: +86 022 60204805, Fax.: +86 022 60202660, Email: zhangxing-hua@hebut.edu.cn; china.peng.jin@gmail.com; hui liu@tju.edu.cn.

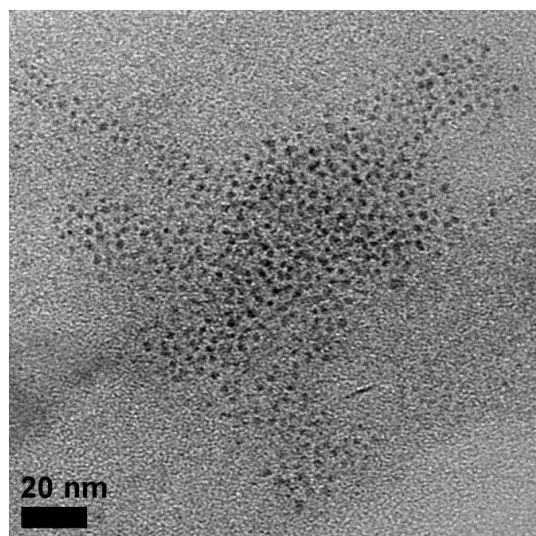

Figure S1. TEM image of CDs-1.

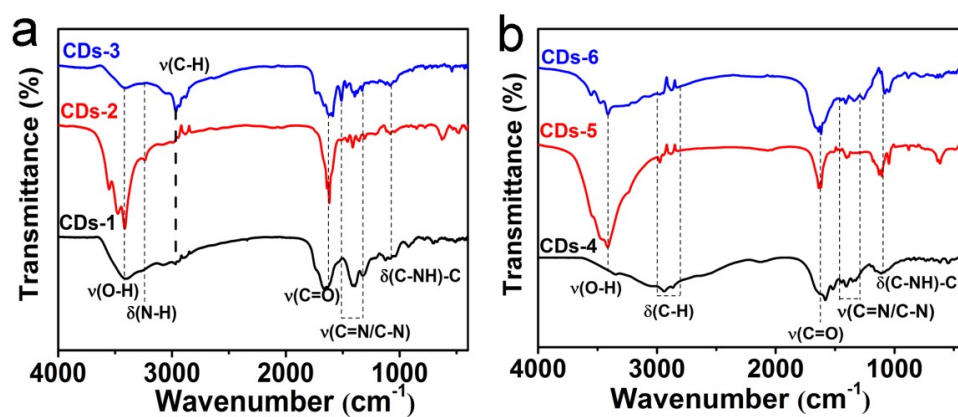

Figure S2. FT-IR spectra of (a) CDs-1, CDs-2, and CDs-3; and (b) CDs-4, CDs-5, and CDs-6.

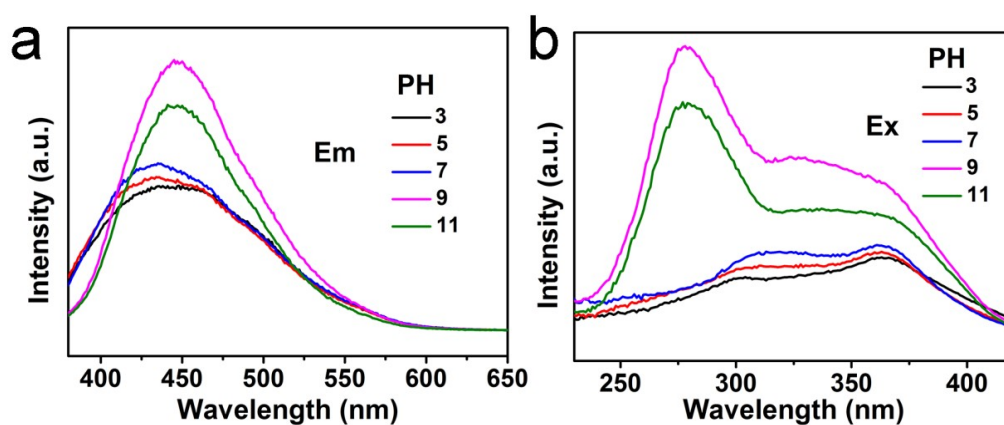

Figure S3. (a, b) Emission (Em) and excitation (Ex) spectra of CDs-6 by adjustment of different pH values (1, 4, 9, 11, 14) via adding  $\text{CH}_3\text{COOH}$  and  $\text{NH}_3\cdot\text{H}_2\text{O}$ .

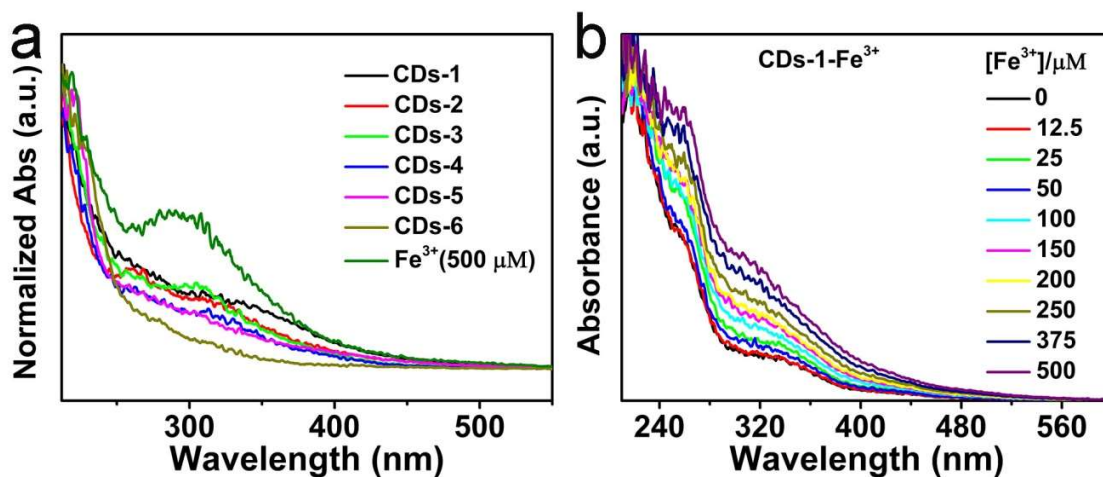

**Figure S4.** (a) Absorption spectra of CDs-1, CDs-2, CDs-3, CDs-4, CDs-5, CDs-6, and  $\text{Fe}^{3+}$  ion solution. (b) Absorption spectra of CDs-1 in the presence of different concentrations of  $\text{Fe}^{3+}$  ions.

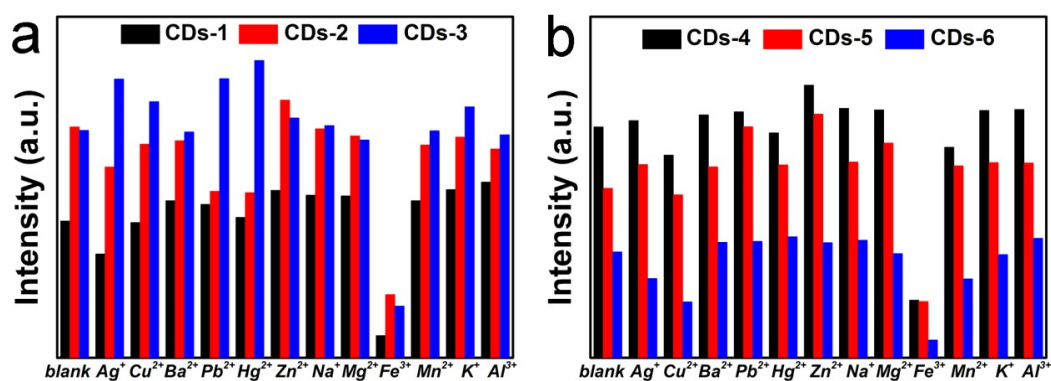

**Figure S5.** Comparison of fluorescence intensities of CDs under 365 nm excitation (including CDs- $x$ ,  $x = 1, 2, 3, 4, 5, 6$ ) in the presence of different metal ions (the concentration of metal ions is 500  $\mu\text{M}$ ; the concentration of CDs-1 is 1 mg/mL).
